# Supplementary material for: White Meat Consumption, All-Cause Mortality, and Cardiovascular Events: A Meta-Analysis of Prospective Cohort Studies
Source: PubMed Central journal article supplement (PMC7924043; doi:10.3390/nu13020676), 2021-02-20
Supplement: nutrients-13-00676-s001.pdf [file nutrients-13-00676-s001.pdf]

**Supplemental Table 1.** Quality of studies assessment (Newcastle-Ottawa scale) for included studies

|                     | <u>Representativeness of the exposed cohort</u> | <u>Selection of the non exposed cohort</u> | <u>Ascertainment of exposure</u> | <u>Demonstration that outcome of interest was not present at start of study</u> | <u>Comparability of cohorts</u> | <u>Assessment of outcome</u> | <u>Length of follow-up</u> | <u>Lost at follow up</u> | <u>Total</u> |
|---------------------|-------------------------------------------------|--------------------------------------------|----------------------------------|---------------------------------------------------------------------------------|---------------------------------|------------------------------|----------------------------|--------------------------|--------------|
| Baik 2013           | *                                               | *                                          |                                  | *                                                                               | *                               |                              | *                          |                          | 5/8          |
| Bernstein 2010      |                                                 | *                                          |                                  | *                                                                               | *                               | *                            | *                          | *                        | 6/8          |
| Bernstein 2012      | *                                               | *                                          |                                  | *                                                                               | *                               | *                            | *                          | *                        | 7/8          |
| Etemadi 2017        | *                                               | *                                          |                                  | *                                                                               | *                               | *                            | *                          |                          | 6/8          |
| Farvid 2017         | *                                               | *                                          |                                  | *                                                                               | *                               | *                            | *                          | *                        | 7/8          |
| Haring 2014         | *                                               | *                                          |                                  | *                                                                               | *                               |                              | *                          |                          | 5/8          |
| Haring 2015         | *                                               | *                                          |                                  | *                                                                               | *                               | *                            | *                          |                          | 6/8          |
| Kappeler 2013       | *                                               | *                                          |                                  | *                                                                               | *                               | *                            | *                          |                          | 6/8          |
| Key 2019            | *                                               | *                                          |                                  | *                                                                               | *                               | *                            | *                          | *                        | 7/8          |
| Lee 2013            |                                                 | *                                          |                                  | *                                                                               | *                               |                              |                            |                          | 3/8          |
| Nagao 2012          | *                                               | *                                          |                                  | *                                                                               | *                               | *                            | *                          |                          | 6/8          |
| Park 2017           | *                                               | *                                          |                                  | *                                                                               | *                               | *                            | *                          |                          | 6/8          |
| Rohrmann 2013       | *                                               | *                                          |                                  | *                                                                               | *                               | *                            | *                          | *                        | 7/8          |
| Sauvaget 2012       | *                                               | *                                          |                                  | *                                                                               | *                               | *                            | *                          |                          | 6/8          |
| Sluik 2017          | *                                               | *                                          |                                  | *                                                                               | *                               | *                            | *                          |                          | 6/8          |
| Takata 2013         | *                                               | *                                          |                                  | *                                                                               | *                               | *                            |                            | *                        | 6/8          |
| Tong 2020           | *                                               | *                                          |                                  | *                                                                               | *                               | *                            | *                          |                          | 6/8          |
| Van den Brandt 2019 | *                                               | *                                          |                                  | *                                                                               | *                               | *                            | *                          |                          | 6/8          |
| Wang 2020           |                                                 | *                                          |                                  | *                                                                               | *                               | *                            | *                          | *                        | 6/8          |
| Whiteman 1999       | *                                               | *                                          |                                  | *                                                                               | *                               | *                            | *                          | *                        | 7/8          |
| Wurtz 2016          | *                                               | *                                          |                                  | *                                                                               | *                               | *                            | *                          | *                        | 7/8          |
| Zhong 2020          | *                                               | *                                          |                                  | *                                                                               | *                               | *                            | *                          | *                        | 7/8          |

**Supplemental Figure 1.** Funnel plots of the log OR versus the standard error for studies evaluating all-cause mortality (Panel A), CVD mortality (Panel B), and CVD events (Panel C).

**A**

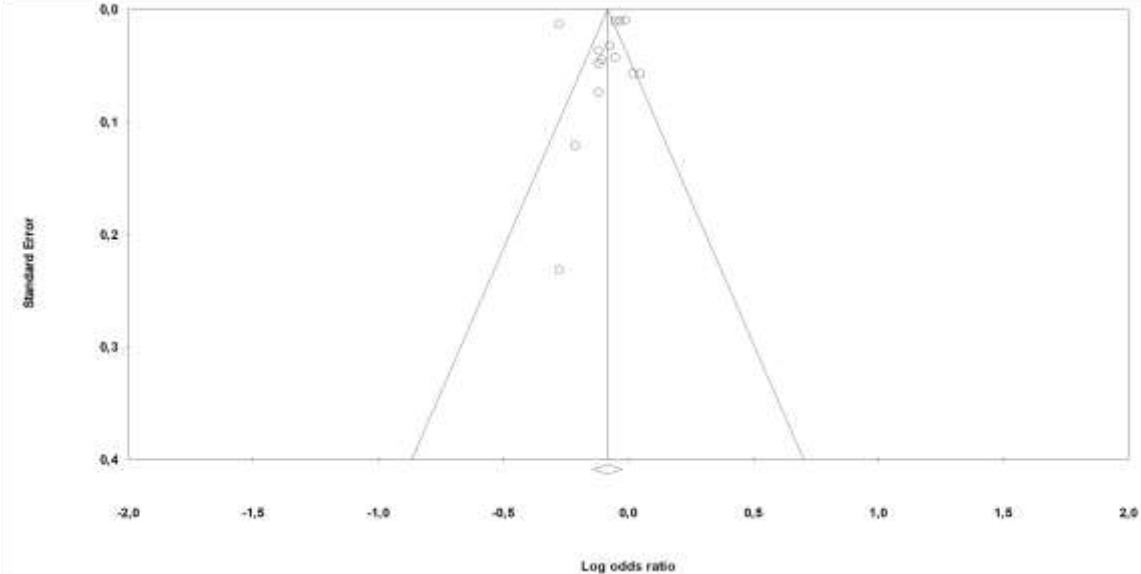

**B**

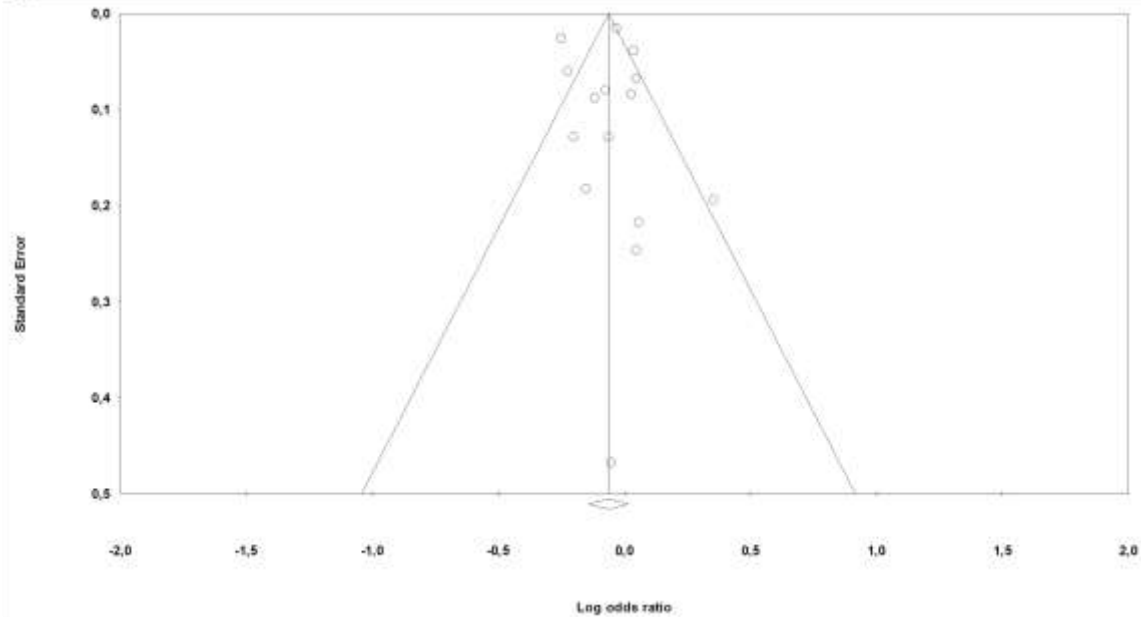

C

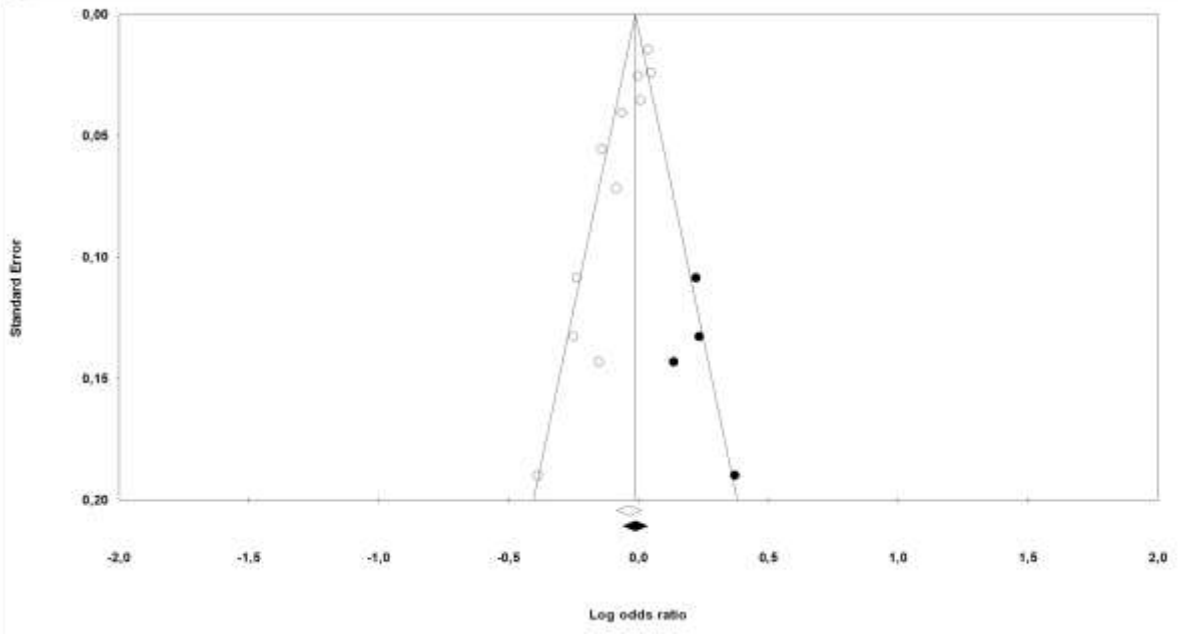

**Supplemental Table 2.** Metaregression analyses for all-cause mortality.

| <b>All-cause mortality</b> |         |         |
|----------------------------|---------|---------|
|                            | Z-value | P-value |
| Age                        | -0,92   | 0,358   |
| Male gender                | -0,97   | 0,334   |
| BMI                        | -1,10   | 0,272   |
| Hypertension               | -1,83   | 0,067   |
| Diabetes                   | -0,34   | 0,736   |
| CAD                        | -0,91   | 0,363   |
| Smoking                    | 0,71    | 0,475   |
| Follow-up                  | -0,62   | 0,534   |
